# Supplementary material for: An assessment of diatom assemblages in the Sea of Okhotsk as a proxy for sea-ice cover
Source: Copernicus journal article supplement (doi:10.5194/jm-39-77-2020), 2020-06-04
Supplement: Supplementary file 1 [file jm-39-77-2020-supplement.zip]

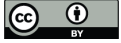

## *Supplement of*

# **An assessment of diatom assemblages in the Sea of Okhotsk as a proxy for sea-ice cover**

**Hiroki Nakamura et al.**

*Correspondence to:* Yusuke Okazaki ([yokazaki@geo.kyushu-u.ac.jp](mailto:yokazaki@geo.kyushu-u.ac.jp))

- [jm-39-77-2020-supplement-title-page.pdf](#)
- [Plates\\_Nakamura.pdf](#)
- [Supplement\\_Nakamura.xlsx](#)

The copyright of individual parts of the supplement might differ from the CC BY 4.0 License.
