# Supplementary material for: An assessment of diatom assemblages in the Sea of Okhotsk as a proxy for sea-ice cover
Source: Copernicus journal article supplement (doi:10.5194/jm-39-77-2020), 2020-06-04
Supplement: Supplementary file 3 [file jm-39-77-2020-supplement.zip]

Archive with 3 entries (3 files):
- Plates_Nakamura.pdf
- Supplement_Nakamura.xlsx
- jm-39-77-2020-supplement-title-page.pdf
