# Supplementary material for: An assessment of diatom assemblages in the Sea of Okhotsk as a proxy for sea-ice cover
Source: Copernicus journal article supplement (doi:10.5194/jm-39-77-2020), 2020-06-04
Supplement: Supplementary file 3 [file jm-39-77-2020-supplement.zip › Supplement_Nakamura.xlsx]

## Sheet: M4_upper
Supplement Table 1. Diatom flux data at M4 upper sediment trap
Flux (vavles m-2 day-1)
Sample No.	1	2	3	4	5	6	7	8	9	10	11	12	13	14	15	16	17	18	19	20	21	22	23	24	25	26	27	28	29	30	31	32	33	34	35	36	37	38	39	40	41	42
Open date	1998-08-07	1998-08-24 09:08:34	1998-09-10 18:17:08	1998-09-28 03:25:43	1998-10-15 12:34:17	1998-11-01 21:42:51	1998-11-19 06:51:25	1998-12-06 16:00:00	1998-12-24 01:08:34	1999-01-10 10:17:08	1999-01-27 19:25:42	1999-02-14 04:34:17	1999-03-03 13:42:51	1999-03-20 22:51:25	1999-04-07 07:59:59	1999-04-24 17:08:34	1999-05-12 02:17:08	1999-05-29 11:25:42	1999-06-15 20:34:16	1999-07-03 05:42:51	1999-07-20 14:51:25	1999-09-08	1999-09-21	1999-10-04	1999-10-17	1999-10-30	1999-11-12	1999-11-25	1999-12-08	1999-12-21	2000-01-03	2000-01-16	2000-01-29	2000-02-11	2000-02-24	2000-03-08	2000-03-21	2000-04-03	2000-04-16	2000-04-29	2000-05-12	2000-05-25
Close date	1998-08-24 09:08:34	1998-09-10 18:17:08	1998-09-28 03:25:43	1998-10-15 12:34:17	1998-11-01 21:42:51	1998-11-19 06:51:25	1998-12-06 16:00:00	1998-12-24 01:08:34	1999-01-10 10:17:08	1999-01-27 19:25:42	1999-02-14 04:34:17	1999-03-03 13:42:51	1999-03-20 22:51:25	1999-04-07 07:59:59	1999-04-24 17:08:34	1999-05-12 02:17:08	1999-05-29 11:25:42	1999-06-15 20:34:16	1999-07-03 05:42:51	1999-07-20 14:51:25	1999-08-07	1999-09-21	1999-10-04	1999-10-17	1999-10-30	1999-11-12	1999-11-25	1999-12-08	1999-12-21	2000-01-03	2000-01-16	2000-01-29	2000-02-11	2000-02-24	2000-03-08	2000-03-21	2000-04-03	2000-04-16	2000-04-29	2000-05-12	2000-05-25	2000-06-07
Duration (days)	17.3809	17.3809	17.381	17.3809	17.3809	17.3809	17.381	17.3809	17.3809	17.381	17.381	17.381	17.3809	17.3809	17.381	17.3809	17.3809	17.3809	17.381	17.3809	17.3809	13	13	13	13	13	13	13	13	13	13	13	13	13	13	13	13	13	13	13	13	13
Actinocyclus curvatulus	1.11097e+06	0	0	75138.1	0	10801.1	0	5063.01	0	1191.3	1012.6	0	0	0	0	27002.7	121512	2.59226e+06	97209.8	129613	27002.7	0	0	45239.5	0	0	541.538	14014.9	0	0	0	0	0	543.198	0	0	7553.77	0	0	0	179957	104629
Actinocyclus ochotensis	0	0	0	0	16201.6	0	0	0	0	0	0	0	0	0	0	0	0	0	32403.3	0	27002.7	138634	1356.2	22619.7	6418.23	0	1624.62	14014.9	0	892.156	541.538	0	0	543.198	4365.38	0	0	0	0	0	0	0
Actinocyclus spp.	0	0	528171	37569	48604.9	0	27002.7	5063.01	1350.14	1191.3	2025.2	1687.67	2250.23	0	4050.41	0	40504.1	0	32403.3	97209.9	54005.5	69316.9	0	22619.7	6418.23	13788.2	0	14014.9	0	0	541.538	737.344	4801.82	0	0	0	0	0	0	0	0	0
Amphola sp.	0	0	0	0	0	0	0	0	0	0	0	0	0	0	0	0	0	0	0	0	0	0	0	0	0	0	0	0	0	1784.31	0	0	0	0	0	0	0	0	0	0	0	0
Asteromphalus hyalinus	0	0	0	37569	0	0	0	0	0	0	0	1687.67	4500.46	0	0	27002.7	81008.2	0	0	0	0	34658.5	0	22619.7	0	0	541.538	0	0	1784.31	0	737.344	0	1086.4	0	0	0	699.813	19976.1	0	0	0
Aulacoseira sp.	0	0	0	0	0	0	0	0	0	0	0	0	0	0	0	0	0	0	0	0	0	0	0	0	0	0	0	0	0	0	0	0	0	0	0	0	0	0	0	0	0	104629
Bacterosira bathyomphala	0	0	105634	0	0	0	0	0	0	1191.3	0	1687.67	2250.23	0	0	0	0	0	32403.3	0	0	34658.5	1356.2	0	0	0	0	0	0	3568.62	0	2212.03	4801.82	0	15278.8	0	0	0	0	0	59985.8	0
Bacterosira bathyomphala resting spore	370323	89183.4	316902	225414	194420	151215	202520	111386	29703	11913	16201.6	18564.4	54005.5	29112.3	28352.9	74257.5	81008.2	0	0	0	0	34658.5	4746.7	203578	89855.3	82729	2707.69	378402	34216.8	23196	7581.54	19171	139253	13036.8	15278.8	27678.6	22661.3	3499.06	279665	203430	299929	732405
Biddulphia spp.	0	0	0	0	0	0	0	0	0	0	0	0	0	0	0	0	0	0	0	0	0	69316.9	3390.5	45239.5	0	0	1083.08	0	2737.35	0	0	0	0	0	2182.69	0	0	2799.25	39952.1	0	419901	104629
Chaetoceros atlanticus	5.36969e+06	35673.3	0	187845	16201.6	0	13501.4	2531.51	2700.27	1191.3	0	0	0	2531.51	0	27002.7	405041	0	16201.6	16201.6	54005.5	34658.5	0	0	0	27576.3	0	0	0	0	0	0	0	0	0	0	0	2099.44	0	45206.7	299929	104629
Chaetoceros spp.	4.07356e+06	17836.7	0	0	16201.6	21602.2	13501.4	0	0	1191.3	1012.6	3375.34	0	0	0	0	0	0	0	32403.3	108011	0	0	0	0	0	0	0	0	0	0	0	0	0	0	0	0	0	0	0	0	0
Corethron sp.	0	0	0	0	0	0	0	0	0	0	0	0	0	0	0	0	0	0	64806.5	0	27002.7	34658.5	0	0	0	0	0	0	0	0	0	0	0	0	0	0	0	0	0	0	0	0
Coscinodiscus spp.	0	0	0	37569	0	0	0	0	0	0	0	0	0	0	0	0	0	0	0	0	0	0	0	0	0	0	0	0	0	0	0	0	0	0	0	0	0	0	0	0	0	0
Cyclotella spp.	0	17836.7	0	375690	210621	32403.3	40504.1	45567.1	4050.41	2382.6	4050.41	0	2250.23	0	2025.2	0	0	0	0	0	0	0	0	45239.5	0	0	0	0	0	0	0	0	0	0	0	0	0	0	0	0	119972	0
Delphineis minutissima	0	0	0	0	0	0	0	0	0	0	0	0	0	0	1012.6	0	0	0	0	0	0	0	0	0	0	0	0	0	0	446.078	0	0	0	0	0	0	0	0	79904.2	0	119972	0
Detonula confervacea	0	89183.4	0	37569	16201.6	0	13501.4	10126	2700.27	1191.3	1012.6	1687.67	2250.23	0	4050.41	6750.69	40504.1	0	0	0	0	0	0	0	0	0	541.538	28029.8	2737.35	0	0	0	0	1086.4	4365.38	0	0	0	79904.2	45206.7	119972	0
Ditylum spp.	0	0	0	0	0	0	54005.5	0	0	0	0	0	0	0	0	0	0	0	0	0	0	0	0	0	0	0	0	0	0	0	0	0	0	0	0	0	0	0	0	0	0	0
Fragilariopsis curta	0	0	0	0	0	0	0	0	0	0	0	1687.67	0	0	0	0	0	0	0	0	0	0	0	0	0	0	0	0	0	0	0	0	0	0	0	0	3776.88	2099.44	0	0	179957	0
Fragilariopsis cylindrus	1.11097e+06	71346.7	1.32043e+06	244199	186319	108011	249775	63287.7	13501.4	24421.6	23796.2	44723.3	40504.1	15189	22277.3	114762	1.76193e+06	1.27021e+08	1.50675e+06	307831	607562	675840	5085.75	305366	54555	13788.2	3249.23	329350	23267.4	18289.2	6769.23	7004.77	108041	5975.18	76394.1	146817	596748	99373.4	838994	870229	4.01905e+06	6.14697e+06
Fragilariopsis oceanica/pseudonana/reginae-jahniae	370323	53510	422537	150276	259226	172818	155266	35441.1	7425.75	16678.2	14176.4	16032.9	24752.5	6961.64	3037.81	47254.8	587310	1.42574e+07	874888	81008.2	243025	242609	1356.2	22619.7	73809.7	0	270.769	224238	21214.4	16058.8	1624.62	10691.5	33612.7	7061.58	21826.9	7220.51	52876.4	6298.32	179785	169525	0	2.43263e+06
Fragilariopsis spp.	0	0	0	0	32403.3	0	0	0	0	0	0	0	0	0	0	0	0	0	0	0	0	0	0	0	0	0	0	0	0	0	0	0	0	0	0	0	0	0	0	0	0	0
Minidiscus variabilis	0	0	0	0	0	0	0	0	0	0	0	1687.67	0	0	0	0	0	0	0	0	0	0	0	158338	12836.5	27576.3	1624.62	0	0	10705.9	0	0	0	1086.4	0	1203.42	0	2799.25	0	0	359915	52314.7
Navicula kariana var. detersa	0	0	0	0	0	5400.55	0	0	0	0	0	0	5625.57	0	0	6750.69	40504.1	0	0	0	0	0	0	0	0	0	0	14014.9	0	0	0	0	0	0	2182.69	9627.35	11330.7	0	49940.1	203430	599858	889349
Navicula spp.	0	0	0	0	0	10801.1	0	0	0	0	2025.2	0	0	0	0	0	0	0	0	0	0	0	0	0	0	0	0	28029.8	0	0	0	0	0	543.198	4365.38	0	0	0	179785	361654	0	366203
Neodenticula seminae	1.24058e+07	329978	4.75354e+06	619889	226823	129613	74257.5	40504.1	30378.1	14295.6	5569.31	21939.7	10126	16454.8	62781.3	411792	1.68092e+06	5.18453e+06	81008.2	210621	27002.7	277268	11866.8	214887	25672.9	1.03411e+06	11913.8	14014.9	7527.7	20519.6	11101.5	13272.2	69626.4	6518.38	79668.2	31288.9	49099.5	9447.47	89892.3	293843	2.63938e+06	680091
Nitzschia spp.	0	0	211268	0	0	0	0	0	0	0	0	0	0	0	0	0	0	0	0	0	0	0	0	0	0	0	0	0	0	0	0	0	0	0	0	0	0	0	0	0	0	0
Odontella sp.	0	0	0	0	0	0	0	0	0	0	0	0	0	0	0	0	0	0	0	0	0	0	0	0	0	0	0	0	0	0	0	0	0	0	0	0	0	0	0	0	0	0
Paralia marina	0	17836.7	0	0	0	10801.1	0	5063.01	1350.14	0	0	0	0	10126	6075.61	6750.69	243025	0	0	0	0	0	0	0	0	0	0	14014.9	0	0	0	0	0	0	0	0	0	0	19976.1	0	119972	0
Paralia sulcata	0	0	0	0	32403.3	0	0	0	0	0	0	0	0	2531.51	0	0	0	0	0	0	0	0	0	0	0	0	0	0	0	0	0	0	0	0	0	0	0	0	0	0	0	0
Pleurosigma sp.	0	0	0	0	0	0	6750.68	0	0	0	0	1687.67	0	0	0	6750.69	121512	0	0	0	0	0	0	0	0	0	0	0	0	892.156	0	0	0	0	4365.38	0	26438.2	699.813	0	22603.3	119972	104629
Porosira glacialis	0	0	0	0	0	0	13501.4	0	0	2382.6	0	0	0	0	0	0	0	0	0	0	0	0	0	0	0	0	0	28029.8	0	0	0	0	0	0	0	0	0	0	0	0	0	0
Proboscia eumorpha	0	0	0	0	0	0	0	0	0	1191.3	0	0	0	0	0	0	0	1.29613e+06	97209.8	1.29613e+06	540055	1.8369e+06	2712.4	226197	0	0	2166.15	14014.9	2737.35	2676.47	1083.08	1474.69	4801.82	1629.59	4365.38	4813.68	0	0	0	0	59985.8	156944
Proboscia subarctica	0	0	105634	0	0	0	0	0	0	0	0	0	0	2531.51	10126	6750.69	40504.1	0	97209.8	64806.6	270027	1.10907e+06	2034.3	90478.9	134783	124094	4873.85	0	1368.67	3568.62	3249.23	737.344	0	1629.59	0	4813.68	30215.1	2099.44	0	0	0	0
Proboscia spp.	0	0	0	0	0	0	13501.4	0	0	0	0	1687.67	0	0	0	0	0	0	0	0	0	103975	678.1	45239.5	0	0	0	0	0	0	0	0	0	0	0	0	0	0	0	0	0	0
Psammothidium spp.	0	0	0	0	0	0	0	0	0	0	0	0	0	0	0	0	0	0	0	0	0	0	0	0	25672.9	0	0	0	0	0	1624.62	0	0	0	0	0	0	0	0	0	119972	261573
Rhizosolenia spp.	0	0	0	0	0	0	0	0	1350.14	0	0	0	0	0	2025.2	0	0	0	0	0	0	34658.5	0	0	0	0	0	0	0	0	0	0	0	0	0	0	0	0	0	0	59985.8	0
Shionodiscus oestrupii	0	0	0	0	0	0	0	0	0	0	0	1687.67	0	0	0	0	0	0	0	0	0	0	0	0	0	0	0	0	0	0	0	0	0	0	0	0	0	0	0	0	0	0
Shionodiscus trifultus group	1.33316e+07	820487	2.85212e+06	864088	162016	108011	135014	60756.2	14851.5	9530.38	9113.42	6750.69	11251.1	10126	18226.8	81008.2	121512	0	324033	388840	378038	797145	25767.8	339296	198965	193034	9747.69	0	4106.02	892.156	8664.62	3686.72	24009.1	9234.37	24009.6	10830.8	45322.6	3499.06	19976.1	45206.7	299929	209259
Shionodiscus variantius	740647	89183.4	0	0	32403.3	21602.2	40504.1	10126	2700.27	0	3037.81	1687.67	4500.46	6328.77	6075.61	13501.4	121512	1.03691e+07	1.19892e+06	810082	243025	901120	2712.4	113099	70600.6	151670	2166.15	112119	5474.69	3568.62	2707.69	2949.38	9603.64	1086.4	6548.07	7220.51	15107.5	699.813	59928.2	22603.3	0	627776
Shionodiscus sp.	0	0	0	0	0	0	0	0	0	0	0	0	0	0	0	0	0	0	0	0	54005.5	0	0	0	0	0	0	0	0	0	0	0	0	0	0	0	0	0	0	0	0	0
Skeletonema costatum	0	0	0	0	0	0	0	0	0	0	0	0	0	0	0	0	0	0	0	0	0	0	0	0	0	0	0	0	0	0	0	0	0	0	0	0	0	1399.63	0	0	119972	0
Staurosira sp.	0	17836.7	0	0	0	0	0	5063.01	0	2382.6	0	0	4500.46	0	0	0	0	0	0	0	27002.7	0	0	0	0	0	0	0	0	0	0	0	0	0	0	0	0	0	0	0	0	52314.7
Thalassionema nitzschioides	0	142693	316902	281768	340235	75607.7	128263	48098.6	13501.4	11317.3	7594.52	21939.7	14626.5	3797.26	23289.9	10126	121512	0	0	0	0	0	3051.45	135718	41718.5	6894.09	0	126134	14371.1	4014.7	541.538	0	38414.6	543.198	10913.4	4813.68	11330.7	3499.06	79904.2	67810	119972	104629
Thalassiosira antarctica	0	0	0	0	32403.3	0	13501.4	0	0	0	3037.81	0	0	0	0	6750.69	121512	1.68497e+07	162016	0	27002.7	0	0	0	0	0	0	0	0	0	0	0	0	0	0	0	0	0	0	0	59985.8	0
Thalassiosira bulbosa	0	35673.3	0	0	0	0	27002.7	0	0	0	0	3375.34	6750.69	1265.75	0	0	0	0	0	0	0	0	0	0	0	0	0	0	0	0	0	0	0	0	0	0	0	0	0	0	0	0
Thalassiosira bulbosa resting spore	0	35673.3	739439	37569	24302.5	16201.6	27002.7	0	1350.14	0	4050.41	0	18001.8	1265.75	6075.61	0	121512	0	32403.3	0	0	0	1356.2	90478.9	6418.23	0	0	56059.6	2737.35	892.156	0	0	19207.3	1629.59	2182.69	2406.84	30215.1	699.813	39952.1	67810	179957	52314.7
Thalassiosira eccentrica	0	0	0	0	0	0	0	0	0	0	0	0	0	0	0	0	0	0	0	0	0	0	0	0	0	0	0	0	0	0	0	0	0	0	0	0	0	0	0	0	0	0
Thalassiosira gravida	0	0	0	0	16201.6	0	13501.4	0	0	0	1012.6	0	0	0	0	0	0	0	0	0	0	0	0	0	0	0	0	0	0	0	0	0	0	0	0	0	0	0	0	0	0	0
Thalassiosira hyalina	0	35673.3	0	0	0	0	0	0	1350.14	3573.89	1012.6	3375.34	6750.69	5063.01	4050.41	0	0	0	0	0	0	34658.5	0	22619.7	0	0	0	14014.9	5474.69	1784.31	1083.08	2949.38	9603.64	0	0	1203.42	7553.77	699.813	79904.2	0	0	209259
Thalassiosira hyperborea	0	0	0	0	0	0	0	0	0	0	0	0	0	0	0	0	0	0	0	0	0	0	0	0	0	0	0	0	0	0	0	0	0	0	0	0	0	0	0	0	0	0
Thalassiosira kushirensis resting spore	0	89183.4	211268	75138.1	81008.2	64806.6	54005.5	30378.1	1350.14	1191.3	3037.81	3375.34	13501.4	3797.26	6075.61	0	0	0	0	0	0	0	0	0	25672.9	0	0	0	6843.37	0	0	0	4801.82	0	8730.76	0	0	0	0	22603.3	59985.8	52314.7
Thalassiosira nordenskioeldii	0	17836.7	0	0	16201.6	32403.3	40504.1	20252.1	1350.14	4765.19	1012.6	3375.34	11251.1	2531.51	4050.41	0	0	0	0	0	0	0	0	22619.7	0	0	0	14014.9	2737.35	3568.62	0	1474.69	0	0	0	0	7553.77	0	0	67810	179957	0
Thalassiosira pacifica	0	0	0	0	0	10801.1	0	5063.01	0	2382.6	0	0	0	1265.75	2025.2	0	0	0	0	0	0	0	0	0	6418.23	0	0	0	1368.67	0	0	0	0	0	2182.69	0	0	0	0	0	0	0
Thalassiosira punctigera	0	0	0	0	0	0	0	0	0	0	0	0	0	0	0	0	0	0	0	0	0	0	0	0	0	0	0	0	0	0	0	0	0	0	0	0	0	0	0	0	0	0
Thalassiosira spp.	0	17836.7	105634	37569	32403.3	64806.6	13501.4	10126	1350.14	2382.6	2025.2	3375.34	4500.46	6328.77	14176.4	13501.4	121512	0	64806.5	32403.3	27002.7	34658.5	0	67859.2	19254.7	0	0	70074.5	2737.35	2676.47	3249.23	5161.41	9603.64	1086.4	6548.07	1203.42	15107.5	699.813	79904.2	22603.3	359915	732405
Thalassiothrix longissima	0	0	0	0	0	5400.55	0	0	0	0	1012.6	0	1125.11	0	0	0	40504.1	0	0	32403.3	0	17329.2	339.05	0	0	0	270.769	0	2053.01	0	541.538	1474.69	0	0	0	0	0	0	19976.1	0	119972	0
Genus indent	740647	0	0	206630	48604.9	21602.2	13501.4	5063.01	2700.27	1191.3	0	3375.34	2250.23	3797.26	0	20252.1	121512	0	0	0	27002.7	0	0	0	0	0	0	0	0	0	0	0	0	0	0	0	0	0	0	0	0	0
Total diatoms	3.96246e+07	2.02446e+06	1.19895e+07	3.53149e+06	2.04141e+06	1.07471e+06	1.38389e+06	518959	135014	119130	106830	170455	247525	131005	229861	907967	6.13637e+06	1.7757e+08	4.71468e+06	3.49956e+06	2.76778e+06	6.51579e+06	67810	2.26197e+06	799070	1.67526e+06	43323.1	1.5066e+06	143711	121779	50904.6	73734.4	480182	54319.8	295754	261142	932890	143112	2.23732e+06	2.53157e+06	1.13973e+07	1.42819e+07
Chaetoceros resting spores	9.25808e+06	1.22181e+06	4.6479e+06	1.50276e+06	1.34474e+06	1.35014e+06	1.45815e+06	708822	149865	147721	102273	138389	135014	101260	113411	236274	486049	1.29613e+06	0	2.62467e+06	0	1.87156e+06	37973.6	1.10384e+07	904971	193034	35200	1.77989e+06	251836	264970	38449.2	90693.4	686660	68443	178981	129969	287043	72080.7	2.97643e+06	1.24318e+06	7.07832e+06	1.30787e+06

## Sheet: M6_upper
Supplement Table 2. Diatom flux data at M6 upper sediment trap
Flux (vavles m-2 day-1)
Sample No.	1	2	3	4	5	6	7	8	9	10	11	12	13	14	15	16	17	18	19	20	21	22	23	24	25	26	27	28	29	30	31	32	33	34	35	36	37	38	39	40	41	42
Open date	1998-08-07	1998-08-24 09:08:34	1998-09-10 18:17:08	1998-09-28 03:25:43	1998-10-15 12:34:17	1998-11-01 21:42:51	1998-11-19 06:51:25	1998-12-06 16:00:00	1998-12-24 01:08:34	1999-01-10 10:17:08	1999-01-27 19:25:42	1999-02-14 04:34:17	1999-03-03 13:42:51	1999-03-20 22:51:25	1999-04-07 07:59:59	1999-04-24 17:08:34	1999-05-12 02:17:08	1999-05-29 11:25:42	1999-06-15 20:34:16	1999-07-03 05:42:51	1999-07-20 14:51:25	1999-09-27	1999-10-09 02:17:08	1999-10-21 04:34:17	1999-11-02 06:51:25	1999-11-14 09:08:34	1999-11-26 11:25:42	1999-12-08 13:42:51	1999-12-20 16:00:00	2000-01-01 18:17:08	2000-01-13 20:34:16	2000-01-25 22:51:25	2000-02-07 01:08:34	2000-02-19 03:25:43	2000-03-02 05:42:51	2000-03-14 07:59:59	2000-03-26 10:17:08	2000-04-07 12:34:17	2000-04-19 14:51:25	2000-05-01 17:08:34	2000-05-13 19:25:42	2000-05-25 21:42:51
Close date	1998-08-24 09:08:34	1998-09-10 18:17:08	1998-09-28 03:25:43	1998-10-15 12:34:17	1998-11-01 21:42:51	1998-11-19 06:51:25	1998-12-06 16:00:00	1998-12-24 01:08:34	1999-01-10 10:17:08	1999-01-27 19:25:42	1999-02-14 04:34:17	1999-03-03 13:42:51	1999-03-20 22:51:25	1999-04-07 07:59:59	1999-04-24 17:08:34	1999-05-12 02:17:08	1999-05-29 11:25:42	1999-06-15 20:34:16	1999-07-03 05:42:51	1999-07-20 14:51:25	1999-08-07	1999-10-09 02:17:08	1999-10-21 04:34:17	1999-11-02 06:51:25	1999-11-14 09:08:34	1999-11-26 11:25:42	1999-12-08 13:42:51	1999-12-20 16:00:00	2000-01-01 18:17:08	2000-01-13 20:34:16	2000-01-25 22:51:25	2000-02-07 01:08:34	2000-02-19 03:25:43	2000-03-02 05:42:51	2000-03-14 07:59:59	2000-03-26 10:17:08	2000-04-07 12:34:17	2000-04-19 14:51:25	2000-05-01 17:08:34	2000-05-13 19:25:42	2000-05-25 21:42:51	2000-06-07
Duration (days)	17.3809	17.3809	17.381	17.3809	17.3809	17.3809	17.381	17.3809	17.3809	17.381	17.381	17.381	17.3809	17.3809	17.381	17.3809	17.3809	17.3809	17.381	17.3809	17.3809	12.0952	12.0952	12.0952	12.0952	12.0952	12.0952	12.0952	12.0952	12.0952	12.0952	12.0952	12.0952	12.0952	12.0952	12.0952	12.0952	12.0952	12.0952	12.0952	12.0952	12.0952
Actinocyclus curvatulus	324033	1.72818e+06	648065	108011	96940.6	7383.56	8860.27	2215.07	2658.08	2953.43	0	886.028	2953.43	0	2953.42	11813.7	3937.9	0	4430.14	1.63722e+06	363826	0	46563.8	0	0	0	0	0	0	0	0	0	0	0	9977.96	0	0	0	194016	72756	0	0
Actinocyclus ochotensis	0	0	0	0	0	0	0	0	0	0	0	0	0	0	0	0	0	0	0	0	0	0	0	0	0	0	0	0	0	2586.88	0	0	0	0	0	0	0	0	0	0	0	0
Actinocyclus spp.	0	432044	162016	0	64627.1	16243.8	1772.05	11075.3	1772.06	2953.43	0	0	5906.85	13290.4	2953.42	5906.85	9844.75	5906.85	22150.7	3.27444e+06	363826	0	46563.8	37251	8954.57	0	0	0	0	12934.4	11973.5	0	0	27716.5	19955.9	0	0	0	0	72756	0	0
Amphola sp.	0	0	0	0	0	0	1772.05	0	1772.06	0	0	0	0	0	2953.42	0	0	0	0	0	0	0	46563.8	0	0	0	0	0	0	0	0	0	0	0	0	6413.74	0	0	0	0	0	0
Asteromphalus hyalinus	0	0	0	18001.8	32313.5	0	1772.05	2215.07	0	0	0	0	0	0	0	0	0	0	0	0	0	22751	46563.8	37251	0	0	7591.92	2736.9	0	2586.88	0	0	0	0	0	0	3637.79	0	0	0	0	0
Aulacoseira sp.	0	0	0	18001.8	0	0	0	0	0	0	0	0	0	0	0	0	0	0	0	0	0	0	0	74502.1	0	0	0	0	0	0	0	0	0	0	0	0	0	0	0	0	0	0
Bacterosira bathyomphala	0	0	0	0	0	1476.71	0	2215.07	0	0	1772.05	886.028	0	4430.14	2953.42	5906.85	3937.9	5906.85	4430.14	818609	181913	22751	0	0	17909.1	0	0	0	0	0	0	549966	963388	55433.1	9977.96	6413.74	0	9515.76	0	0	0	0
Bacterosira bathyomphala resting spore	108011	0	0	90009.1	161568	8860.28	8860.27	5537.67	2658.08	41348	12404.4	15948.5	39871.2	93032.9	73835.6	147671	61037.5	28057.5	13290.4	0	909566	318514	93127.5	186255	44772.9	180157	98695	43790.4	49250.2	41390	79823.6	2.96982e+06	5.61977e+06	997795	349229	134689	54566.9	76126.1	388031	363780	0	0
Biddulphia spp.	0	0	0	0	0	0	0	0	0	0	0	0	0	0	0	0	0	0	0	0	0	45502.1	93127.5	372510	0	0	0	2736.9	0	2586.88	0	0	0	0	0	0	0	0	0	36378	0	901234
Chaetoceros atlanticus	702071	1.62016e+06	2.0252e+06	468048	0	0	0	1107.53	886.028	0	0	0	0	0	0	0	0	0	5537.67	0	545740	22751	0	0	0	0	0	0	0	0	0	0	0	0	0	0	0	0	0	0	0	0
Chaetoceros spp.	864088	756077	405041	225023	0	0	0	0	886.028	0	0	0	0	0	2953.42	0	0	0	0	7.36749e+06	727653	0	0	0	0	0	15183.8	0	0	0	0	109993	0	0	0	12827.5	0	0	0	0	0	0
Corethron sp.	0	0	0	0	0	0	0	0	0	0	0	0	0	0	0	0	0	0	0	0	0	0	0	0	0	0	0	0	0	0	0	0	0	0	0	0	0	0	0	0	0	0
Coscinodiscus spp.	0	0	0	0	0	1476.71	3544.11	0	886.028	0	0	0	5906.85	0	0	0	0	0	0	0	0	0	0	0	0	0	0	0	0	0	0	0	0	0	0	0	0	0	0	0	0	0
Cyclotella spp.	0	0	0	18001.8	0	738.356	1772.05	0	886.028	1476.71	0	1772.06	0	0	2953.42	0	0	1476.71	0	0	0	0	0	0	0	0	0	0	0	0	0	0	0	0	0	0	0	0	0	0	0	0
Delphineis minutissima	0	0	0	0	0	0	0	0	0	2953.43	0	0	0	0	2953.42	0	0	0	0	0	0	0	0	0	0	0	0	0	0	0	0	0	160565	0	0	0	0	0	0	0	0	0
Detonula confervacea	0	0	0	18001.8	32313.5	0	0	0	0	0	886.027	1772.06	1476.71	0	2953.42	0	3937.9	0	6645.2	2.45583e+06	181913	45502.1	0	74502.1	8954.57	13858.3	0	16421.4	4477.29	5173.75	3991.18	0	1.28452e+06	110866	29933.9	25655	21826.8	0	0	0	0	0
Ditylum spp.	0	0	0	0	0	0	0	0	0	0	0	886.028	0	0	0	0	0	0	0	0	0	0	0	0	0	0	0	0	0	0	0	0	0	0	0	0	0	0	0	0	0	0
Fragilariopsis curta	0	0	0	0	0	0	0	0	0	0	0	0	0	0	0	0	0	0	0	0	0	0	0	0	0	0	0	0	0	2586.88	3991.18	0	321129	0	0	0	3637.79	0	0	0	0	0
Fragilariopsis cylindrus	972099	1.18812e+06	2.9973e+06	531054	371606	13290.4	9746.3	6645.21	11518.4	18458.9	17277.5	19492.6	14028.8	55376.7	23627.4	62021.9	20674	22889	2215.07	1.05191e+08	2.00105e+06	455021	931275	670519	85068.4	187087	37959.6	49264.2	57085.4	29749.1	75832.4	2.74983e+06	7.14513e+06	609764	259427	157137	90944.9	1.11334e+06	7.17858e+06	400158	1.4784e+07	1.04994e+08
Fragilariopsis oceanica/pseudonana/reginae-jahniae	108011	432044	243025	117012	96940.6	11075.3	4430.14	9414.04	5316.17	22150.7	14176.4	12404.4	14028.8	17720.6	16243.8	44301.4	12798.2	14028.8	0	9.0047e+06	545740	79628.6	395792	149004	13431.9	41574.8	22775.8	31474.3	21267.1	31042.5	59867.7	1.09993e+06	3.13101e+06	415748	69845.7	137895	52748	38063	436535	109134	232819	4.95679e+06
Fragilariopsis spp.	0	0	0	0	0	0	0	0	0	0	0	0	0	0	0	0	0	0	0	0	0	0	0	0	0	0	0	0	0	0	0	0	0	0	0	0	0	0	0	0	0	0
Minidiscus variabilis	0	0	0	0	0	0	0	0	0	0	0	0	0	0	0	0	0	0	0	0	0	0	0	37251	0	0	0	0	0	0	0	0	0	0	0	0	0	0	0	0	0	0
Navicula kariana var. detersa	270027	1.62016e+06	81008.2	27002.7	0	0	0	0	0	0	443.014	443.014	0	4430.14	2953.42	0	0	0	0	0	0	0	0	0	0	0	0	0	2238.64	0	0	0	80282.4	27716.5	0	0	16370.1	19031.5	242520	72756	465638	9.01234e+06
Navicula spp.	0	0	0	0	0	0	0	0	0	0	0	0	0	0	5906.85	0	0	0	0	0	0	22751	0	18625.5	0	6929.13	7591.92	0	0	2586.88	3991.18	0	0	0	0	0	3637.79	28547.3	0	0	0	0
Neodenticula seminae	4.37444e+06	4.75248e+06	3.40234e+06	1.0171e+06	743211	10337	23036.7	17166.8	23479.7	28057.5	11518.4	16391.5	31011	181636	60545.2	106323	25596.4	47993.2	108538	2.04652e+06	4.09305e+06	466396	1.79271e+06	521515	170137	284094	144246	26000.5	2238.64	77606.3	45898.6	604962	642259	124724	134702	48103.1	56385.8	71368.2	2.23118e+06	1.60063e+06	3.89972e+06	2.1179e+07
Nitzschia spp.	0	0	0	0	0	0	0	0	886.028	0	0	0	0	0	0	0	0	0	0	0	0	0	0	0	0	0	0	0	0	0	0	0	0	0	0	0	0	0	0	0	0	0
Odontella sp.	0	0	0	0	0	738.356	0	0	0	738.356	0	0	0	0	0	0	0	0	0	0	0	0	0	0	0	0	0	0	0	0	0	0	0	0	0	0	0	0	0	0	0	0
Paralia marina	0	0	0	0	0	0	0	1107.53	0	0	0	0	14767.1	0	20674	0	25596.4	0	0	0	0	0	0	0	0	0	0	0	0	2586.88	0	0	0	0	0	6413.74	0	0	97007.9	36378	0	0
Paralia sulcata	0	0	0	0	0	0	0	0	0	0	0	0	0	0	0	0	0	0	0	0	0	0	0	0	0	0	0	0	0	0	0	0	0	0	0	0	0	0	0	0	0	0
Pleurosigma sp.	108011	0	0	9000.91	0	0	0	0	0	0	0	0	0	0	0	0	0	0	0	0	0	0	0	0	0	0	0	0	0	0	0	0	80282.4	27716.5	0	16034.4	1818.9	0	0	36378	58204.7	0
Porosira glacialis	0	0	0	0	0	0	0	0	0	0	0	0	1476.71	4430.14	2953.42	5906.85	1968.95	1476.71	0	818609	0	0	0	0	0	0	0	0	0	0	3991.18	0	0	0	0	0	0	0	97007.9	36378	0	0
Proboscia eumorpha	108011	0	0	18001.8	0	0	1772.05	0	0	0	886.027	886.028	0	0	0	0	0	0	2215.07	1.39164e+07	1.81913e+06	68253.1	279383	409762	35818.3	13858.3	7591.92	2736.9	8954.58	0	7982.36	0	0	27716.5	0	0	0	0	0	0	0	0
Proboscia subarctica	0	0	0	0	0	0	0	0	0	0	886.027	0	1476.71	4430.14	0	11813.7	0	1476.71	0	818609	2.7287e+06	227510	838148	372510	107455	152441	113879	27369	6715.93	5173.75	27938.3	0	160565	0	0	12827.5	0	9515.76	97007.9	109134	0	0
Proboscia spp.	0	0	0	0	0	0	0	0	0	0	0	0	0	0	0	0	0	0	0	0	0	0	0	0	0	0	0	0	0	0	0	0	0	0	0	0	0	0	0	0	0	0
Psammothidium spp.	0	0	0	0	0	0	0	0	0	0	0	0	0	0	0	0	0	0	0	0	0	0	0	0	0	0	0	0	0	0	0	0	0	0	0	0	0	0	0	0	0	0
Rhizosolenia spp.	0	0	162016	72007.3	129254	0	0	0	0	0	0	0	10337	26580.8	2953.42	17720.6	0	0	0	0	0	0	0	0	0	0	0	0	0	0	0	0	0	0	0	0	0	0	0	0	0	0
Shionodiscus oestrupii	0	0	0	0	0	0	0	0	0	0	0	0	0	0	0	0	0	0	0	0	0	0	0	0	0	0	0	0	0	0	0	0	0	0	0	0	0	0	0	0	0	0
Shionodiscus trifultus group	2.37624e+06	9.28894e+06	4.69847e+06	756077	710898	28057.5	49617.5	21043.2	8860.28	14767.1	13290.4	8860.28	16243.8	39871.2	5906.85	29534.3	29534.3	28057.5	48731.5	7.36749e+06	1.63722e+06	637029	1.11753e+06	931276	519365	429606	220166	35579.7	26863.7	36216.3	19955.9	0	160565	27716.5	49889.8	12827.5	0	9515.76	194016	545670	116409	901234
Shionodiscus variantius	324033	216022	0	72007.3	32313.5	8860.28	5316.16	7752.74	7088.22	2953.43	886.027	3544.11	5906.85	13290.4	8860.27	41348	19689.5	7383.56	8860.27	4.91166e+06	1.63722e+06	295763	1.16409e+06	484264	116409	194016	30367.7	13684.5	11193.2	5173.75	23947.1	329979	642259	55433.1	49889.8	16034.4	0	28547.3	0	72756	1.86255e+06	4.50617e+06
Shionodiscus sp.	0	0	648065	0	32313.5	11813.7	1772.05	0	0	0	2658.08	0	0	0	0	0	0	0	0	0	0	0	0	0	0	0	0	0	0	5173.75	0	0	0	0	0	0	0	0	0	0	0	0
Skeletonema costatum	0	0	0	0	0	0	0	0	0	0	0	0	0	0	0	0	0	0	0	0	0	22751	0	0	0	0	0	2736.9	0	0	0	109993	321129	0	0	0	0	0	0	0	0	0
Staurosira sp.	0	0	162016	0	0	2953.43	1772.05	0	0	0	1772.05	0	0	0	0	0	1968.95	0	0	818609	0	0	46563.8	37251	0	13858.3	0	0	0	0	0	0	0	0	0	0	0	0	0	0	0	0
Thalassionema nitzschioides	216022	108011	81008.2	162016	500860	60545.2	37213.1	14397.9	20378.6	30272.6	2658.08	7088.22	22150.7	35441.1	8860.27	35441.1	22642.9	23627.4	14397.9	409305	0	79628.6	116409	37251	13431.9	34645.7	7591.92	21895.2	19028.5	9054.07	21951.5	659959	1.68593e+06	471181	84812.7	54516.8	10913.4	23789.4	48503.9	181890	58204.7	0
Thalassiosira antarctica	108011	0	162016	72007.3	0	0	5316.16	0	0	4430.14	4430.14	0	0	0	0	0	0	0	0	0	0	0	0	0	0	0	0	0	0	0	0	0	0	0	0	0	0	0	0	0	0	9.91358e+06
Thalassiosira bulbosa	0	0	0	0	0	0	0	0	0	0	0	886.028	0	0	0	0	0	0	0	0	0	0	0	0	0	0	0	0	0	0	0	0	0	0	0	0	0	0	0	0	0	0
Thalassiosira bulbosa resting spore	324033	0	0	36003.7	0	0	3544.11	3322.6	2658.08	5906.85	9746.3	3544.11	4430.14	0	0	0	1968.95	5906.85	0	818609	727653	45502.1	0	74502.1	0	0	22775.8	16421.4	0	7760.63	0	989938	160565	277165	0	19241.2	14551.2	0	0	0	0	0
Thalassiosira eccentrica	0	0	0	0	0	0	3544.11	1107.53	0	0	0	0	0	0	0	0	0	0	0	0	0	0	46563.8	0	0	0	0	0	0	0	0	0	0	0	0	0	0	0	0	0	0	0
Thalassiosira gravida	0	0	0	18001.8	32313.5	0	3544.11	4430.14	2658.08	1476.71	886.027	0	0	4430.14	2953.42	0	0	0	0	0	0	0	0	0	0	0	0	0	0	0	0	0	0	0	0	0	0	0	0	0	0	0
Thalassiosira hyalina	0	0	0	18001.8	161568	0	0	3322.6	3544.11	0	0	3544.11	0	0	11813.7	11813.7	3937.9	4430.14	0	1.63722e+06	0	22751	0	37251	0	0	7591.92	10947.6	6715.93	0	19955.9	219986	642259	83149.6	9977.96	6413.74	14551.2	0	0	0	232819	0
Thalassiosira hyperborea	0	0	0	0	0	0	0	0	0	0	0	0	0	0	0	0	0	0	0	0	0	0	0	0	0	0	0	0	0	0	0	0	160565	0	0	0	0	0	0	0	0	0
Thalassiosira kushirensis resting spore	0	0	0	18001.8	0	4430.14	0	2215.07	1772.06	10337	8860.27	3544.11	4430.14	31011	17720.5	23627.4	0	2953.43	0	0	0	22751	0	74502.1	26863.7	0	7591.92	10947.6	6715.93	7760.63	3991.18	439973	160565	27716.5	0	19241.2	0	0	97007.9	36378	0	0
Thalassiosira nordenskioeldii	216022	864088	1.13411e+06	72007.3	96940.6	0	0	2215.07	886.028	7383.56	2658.08	886.028	4430.14	4430.14	0	23627.4	5906.85	1476.71	0	9.0047e+06	0	22751	0	37251	0	27716.5	7591.92	8210.7	0	0	7982.36	329979	160565	0	9977.96	6413.74	0	0	0	0	0	0
Thalassiosira pacifica	0	0	486049	0	0	0	0	0	886.028	0	0	0	1476.71	0	0	0	0	0	0	0	0	0	0	0	0	0	0	0	0	0	0	0	0	0	0	0	0	0	0	0	0	0
Thalassiosira punctigera	0	0	0	0	0	0	0	0	0	0	0	0	0	0	0	0	0	0	0	0	0	0	0	0	0	0	0	0	0	0	0	0	0	0	0	0	0	0	0	0	0	0
Thalassiosira spp.	216022	0	0	54005.5	32313.5	25104.1	15948.5	5537.67	2658.08	10337	1772.05	5316.17	2953.43	8860.28	8860.27	11813.7	1968.95	2953.43	4430.14	4.09305e+06	363826	113755	46563.8	223506	0	41574.8	0	2736.9	2238.64	5173.75	7982.36	109993	160565	0	0	6413.74	7275.59	0	0	0	0	901234
Thalassiothrix longissima	0	0	0	0	0	2953.43	0	0	0	0	0	0	1476.71	0	5906.85	5906.85	0	1476.71	7752.74	0	0	0	0	0	8954.57	0	0	0	0	6467.19	5986.77	0	0	0	0	0	14551.2	0	194016	72756	0	0
Genus indent	0	216022	0	90009.1	0	0	3544.11	1661.3	3101.1	4430.14	1329.04	1772.06	1476.71	0	2953.42	5906.85	5906.85	1476.71	0	0	0	0	0	93127.6	17909.1	6929.13	15183.8	10947.6	2238.64	2586.88	11973.5	54996.6	481694	0	0	3206.87	10913.4	0	291024	90944.9	232819	0
Total diatoms	1.17192e+07	2.32224e+07	1.74978e+07	4.12242e+06	3.32829e+06	216338	198470	125705	108095	213385	111196	110753	208216	542692	307156	608406	262855	208955	253625	1.7641e+08	1.8828e+07	3.06001e+06	7.14754e+06	4.99164e+06	1.19544e+06	1.62835e+06	774376	336639	227222	303958	449008	1.13293e+07	2.43256e+07	3.36756e+06	1.0876e+06	708719	378331	1.42736e+06	1.17865e+07	3.94701e+06	2.19432e+07	1.57265e+08
Chaetoceros resting spores	2.05221e+06	5.61657e+06	9.07292e+06	1.06211e+06	4.10382e+06	189019	187838	170560	161257	261378	101007	69996.2	88602.8	225937	165392	348504	289436	162438	66452	1.57992e+08	7.53121e+07	5.07348e+06	8.80055e+06	9.75977e+06	716366	2.12031e+06	865479	402324	304456	155213	458986	1.6719e+07	3.29158e+07	2.43905e+06	1.57652e+06	1.1224e+06	403795	333052	3.00724e+06	2.29181e+06	1.39691e+06	1.80247e+06
